# Supplementary material for: Dynamics of counterion-induced attraction between vimentin filaments followed in microfluidic drops
Source: Royal Society of Chemistry journal article supplement (doi:10.1039/c3lc51418h), 2014-01-01
Supplement: c3lc51418h1.pdf [file c3lc51418h1.pdf]

# multivalent ion: $\text{Co}(\text{NH}_3)_6^{3+}$

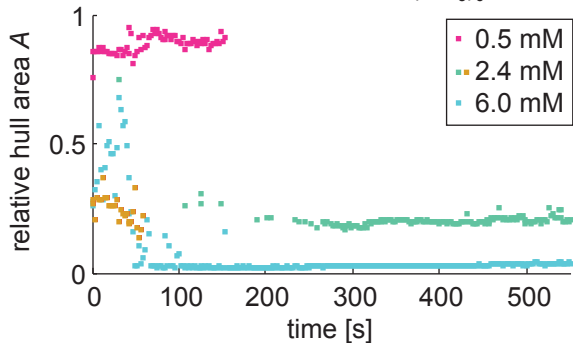

In the presence of the trivalent hexammine cobalt ions vimentin filaments aggregate over time for concentrations of 2.4 mM and 6 mM. Since we do not observe aggregation for 0.5 mM hexammine cobalt, the threshold concentration for vimentin aggregation is in between 0.5 mM and 2.4 mM.
